# Supplementary material
Source: MDPI journal article supplement (https://www.mdpi.com/2227-7102/14/1/34)

Table S1

Research Study Survey  
3D Models as a Tool for Learning *Squalus* Anatomy: An Analysis of Student Satisfaction

Part 1

Please indicate the degree to which you agree with the following statements based on your experience using the 3D-printed models of the *Squalus* chondrocranium and brain. 1 = strongly disagree; 5 = strongly agree.

| Question                                                                                                                          | 1<br>(Strongly<br>disagree) | 2<br>(Disagree) | 3<br>(Neutral)   | 4<br>(Agree) | 5<br>(Strongly<br>agree)    |
|-----------------------------------------------------------------------------------------------------------------------------------|-----------------------------|-----------------|------------------|--------------|-----------------------------|
| 1. The 3D models accurately depict the anatomical features I need to know.                                                        | 1                           | 2               | 3                | 4            | 5                           |
| 2. The <b>interaction</b> between the 3D chondrocranium and brain was helpful in understanding the anatomy of the chondrocranium. | 1                           | 2               | 3                | 4            | 5                           |
| 3. The ability to <b>physically</b> handle the chondrocranium was helpful in understanding its anatomical features.               | 1                           | 2               | 3                | 4            | 5                           |
| 4. The <b>size</b> of the model was appropriate for identifying all the necessary structures.                                     | 1                           | 2               | 3                | 4            | 5                           |
| 5. Compared to the preserved specimen, I am <b>less</b> worried about damaging or breaking the 3D model.                          | 1                           | 2               | 3                | 4            | 5                           |
| 6. Using the 3D model improved my learning experience.                                                                            | 1                           | 2               | 3                | 4            | 5                           |
| 7. <b>Compared to viewing the preserved specimen</b> for understanding anatomical relationships, <b>the 3D model was:</b>         | 1<br><u>Less</u><br>helpful | 2               | 3<br>the<br>same | 4            | 5<br><u>More</u><br>helpful |

## Research Study Survey

### 3D Models as a Tool for Learning *Squalus* Anatomy: An Analysis of Student Satisfaction

## Part 2: Additional comments

1. What do you think works well with the chondrocranium 3D model?
2. What do you think could be improved with the chondrocranium 3D model?
3. Do you have any other feedback, comments, or questions?

Thank you for taking the time to fill out this survey - your input is invaluable. Results from this study will be disseminated later in spring 2023.

Table S2

Research Study Survey  
3D Models as a Tool for Learning *Squalus* Anatomy: An Analysis of Student Satisfaction

Part 1

Please indicate the degree to which you agree with the following statements based on your experience using the 3D-printed models of the *Squalus* chondrocranium and brain. 1 = strongly disagree; 5 = strongly agree.

| Question                                                                                                                            | 1<br>(Strongly<br>disagree) | 2<br>(Disagree) | 3<br>(Neutral)   | 4<br>(Agree) | 5<br>(Strongly<br>agree)    |
|-------------------------------------------------------------------------------------------------------------------------------------|-----------------------------|-----------------|------------------|--------------|-----------------------------|
| 1. The 3D model accurately depicts the anatomical features I need to know.                                                          | 1                           | 2               | 3                | 4            | 5                           |
| 2. The <b>interaction</b> between the 3D chondrocranium and brain was helpful in understanding the anatomy of the brain.            | 1                           | 2               | 3                | 4            | 5                           |
| 3. The ability to <b>physically</b> handle the brain was helpful in understanding its anatomical features.                          | 1                           | 2               | 3                | 4            | 5                           |
| 4. The <b>size</b> of the brain model was appropriate for identifying all the necessary structures.                                 | 1                           | 2               | 3                | 4            | 5                           |
| 5. Compared to the dissected specimen, I am <b>less</b> worried about damaging or breaking the 3D model.                            | 1                           | 2               | 3                | 4            | 5                           |
| 6. Using the 3D model improved my learning experience.                                                                              | 1                           | 2               | 3                | 4            | 5                           |
| 7. The color coding of the brain was helpful in identifying structures.                                                             | 1                           | 2               | 3                | 4            | 5                           |
| 8. <b>Compared to viewing the dissected/preserved specimen</b> for understanding anatomical relationships, <b>the 3D model was:</b> | 1<br><u>Less</u><br>helpful | 2               | 3<br>the<br>same | 4            | 5<br><u>More</u><br>helpful |

## Research Study Survey

### 3D Models as a Tool for Learning *Squalus* Anatomy: An Analysis of Student Satisfaction

## Part 2: Additional comments

1. What do you think works well with the brain 3D model?
2. What do you think could be improved with the brain 3D model?
3. Do you have any other feedback, comments, or questions?

Thank you for taking the time to fill out this survey - your input is invaluable. Results from this study will be disseminated later in spring 2023.

Figure S1

# Dogfish Shark: Chondrocranium Anatomy

## Left Lateral View

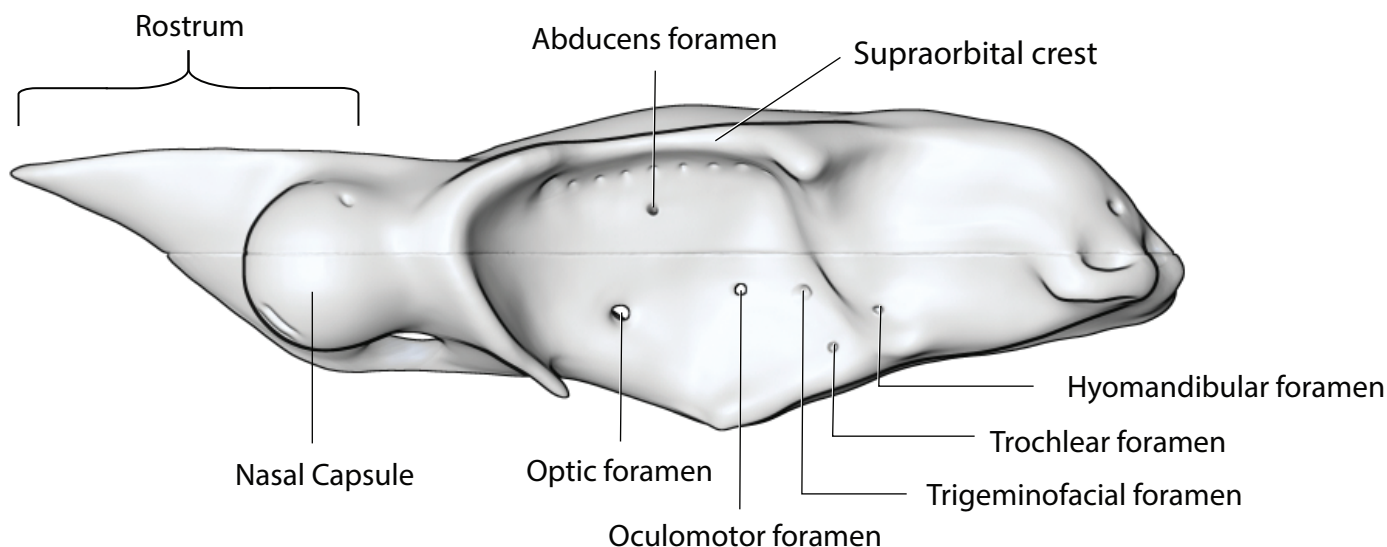

## Dorsal View

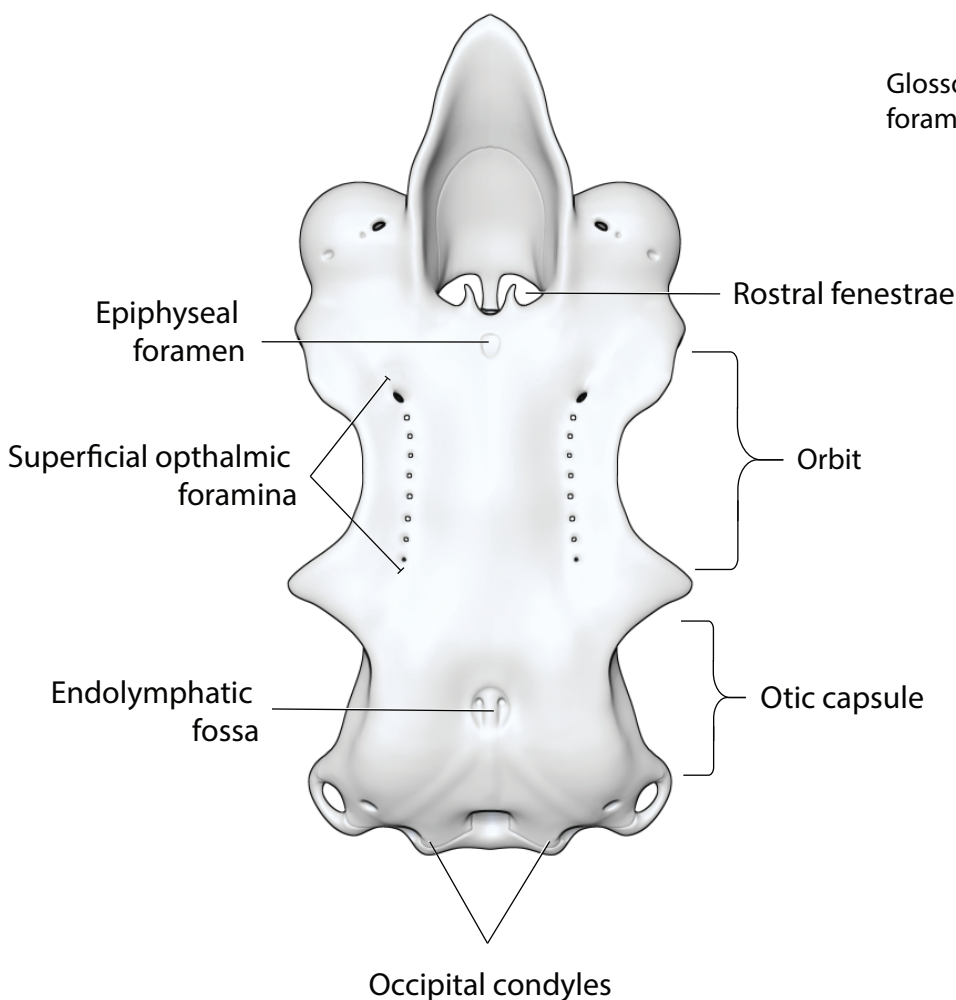

## Posterior View

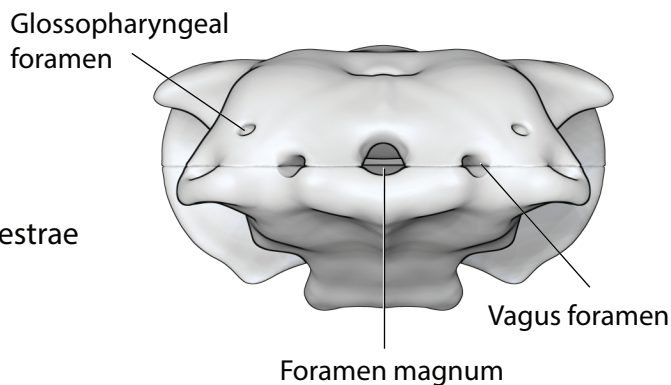

### *What's a chondrocranium?*

The chondrocranium is the skull of the dogfish shark, *Squalus acanthias*. This structure is cartilaginous and houses the shark's brain and olfactory organs.

Figure S2

# Dogfish Shark: Brain Anatomy

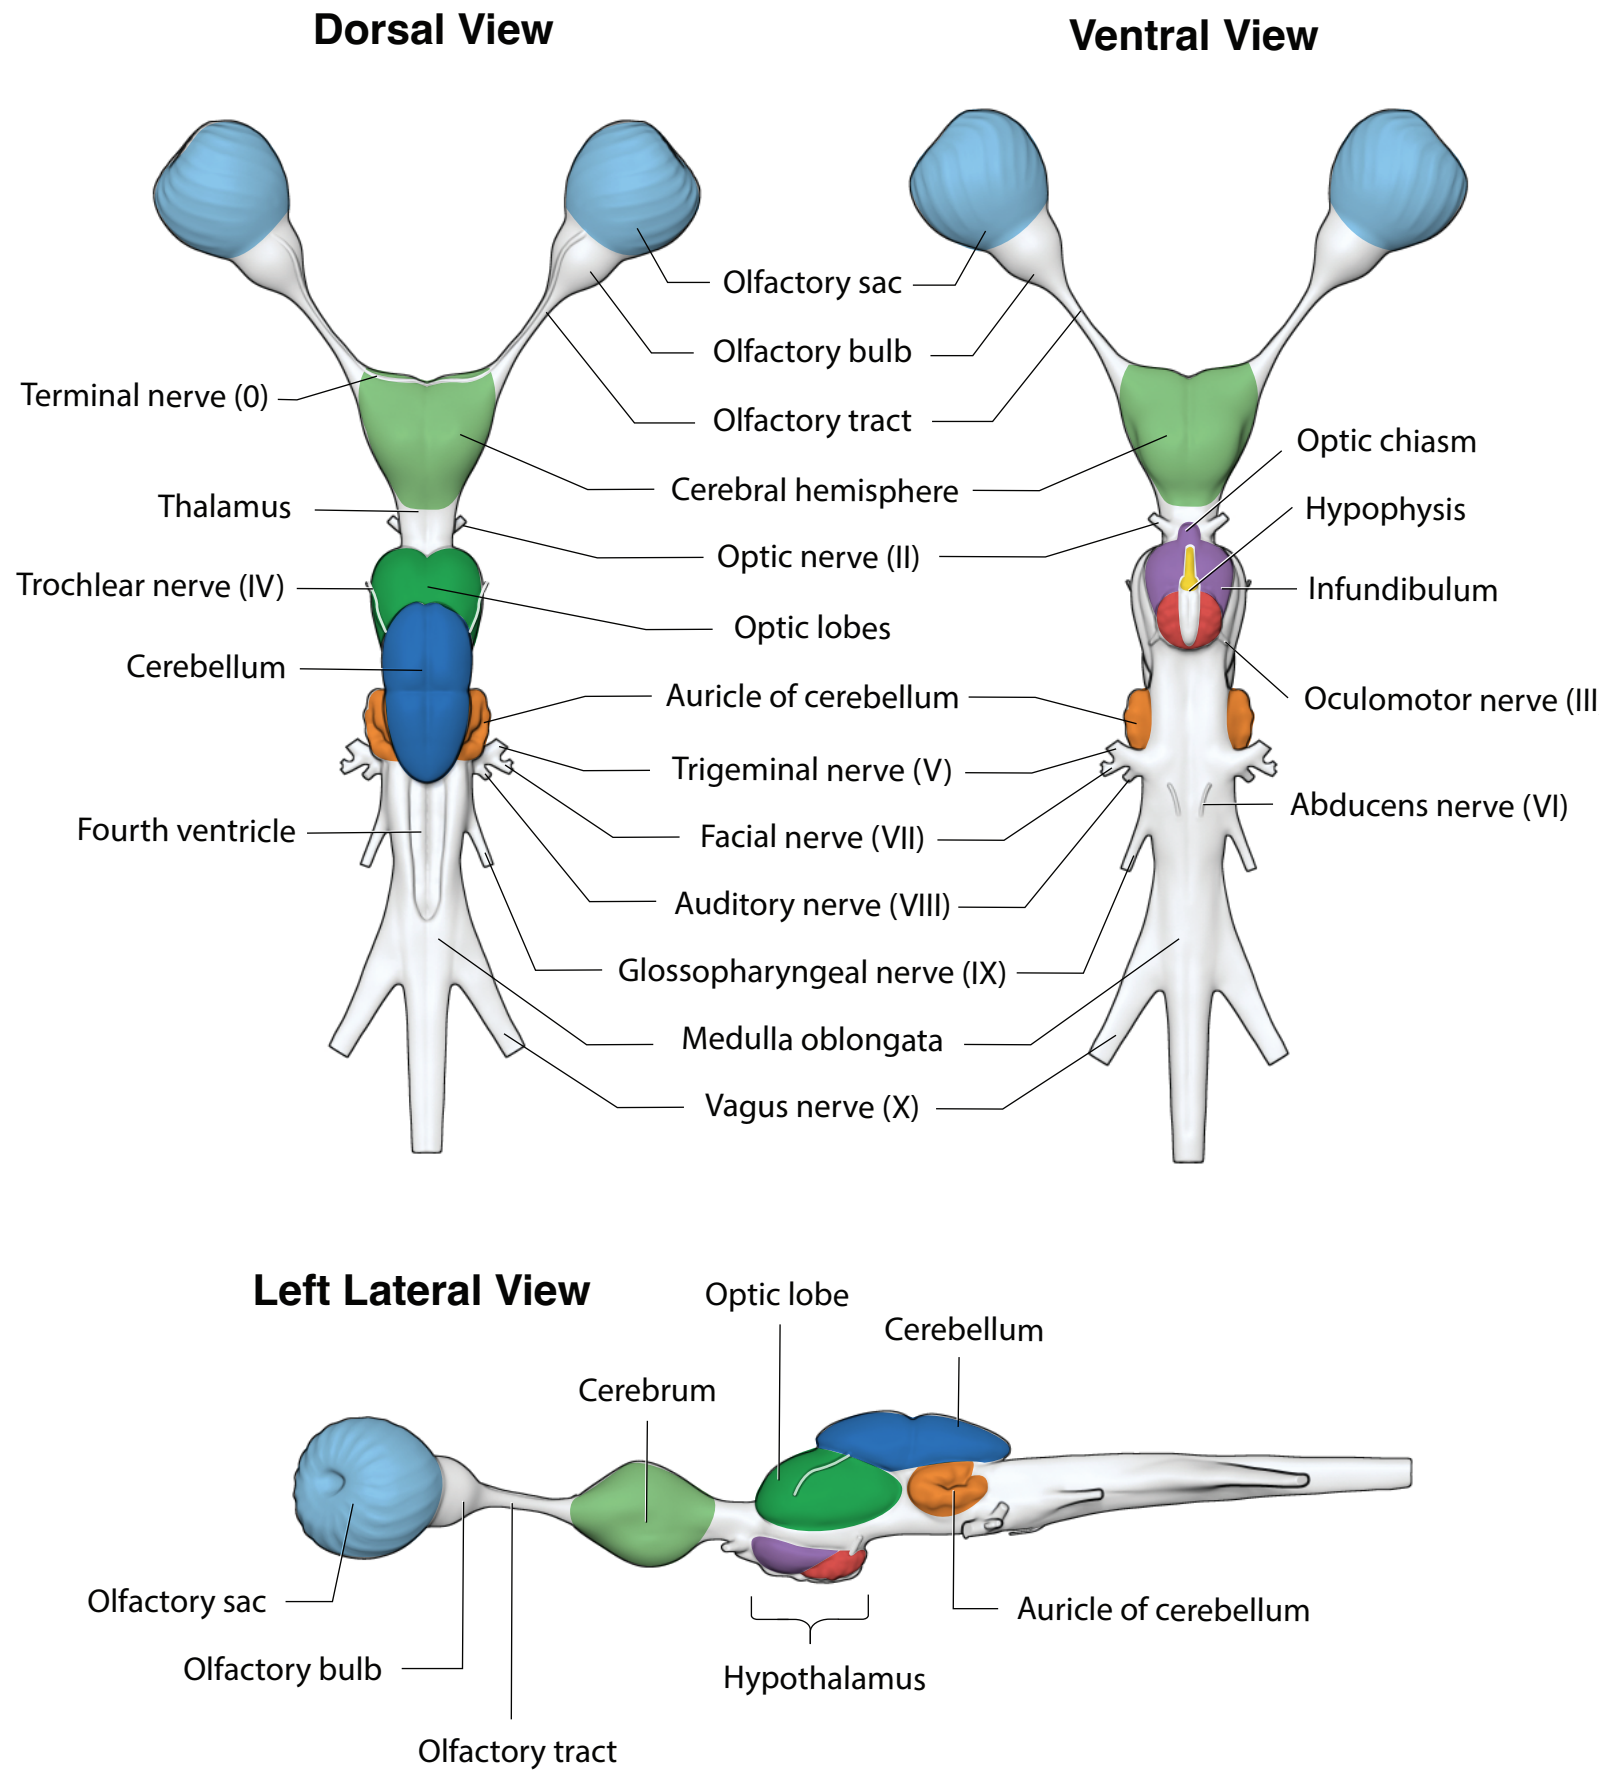

Supplement: s1 [file s1 › DogfishShark_SupplementaryMaterials.pdf]
